# Supplementary material for: Cellulose-Chitosan-Nanohydroxyapatite Hybrid Composites by One-Pot Synthesis for Biomedical Applications
Source: MDPI journal article supplement (doi:10.3390/polym13101655), 2021-05-19
Supplement: s1 [file s1]

# Supplementary Material: Cellulose-Chitosan-Nanohydroxyapatite Hybrid Composites by One-Pot Synthesis for Biomedical Applications

Katia Jarquin-Yáñez, Efrain Rubio-Rosas, Gabriela Piñón-Zárate, Andrés Castell-Rodríguez, Martha Poisot

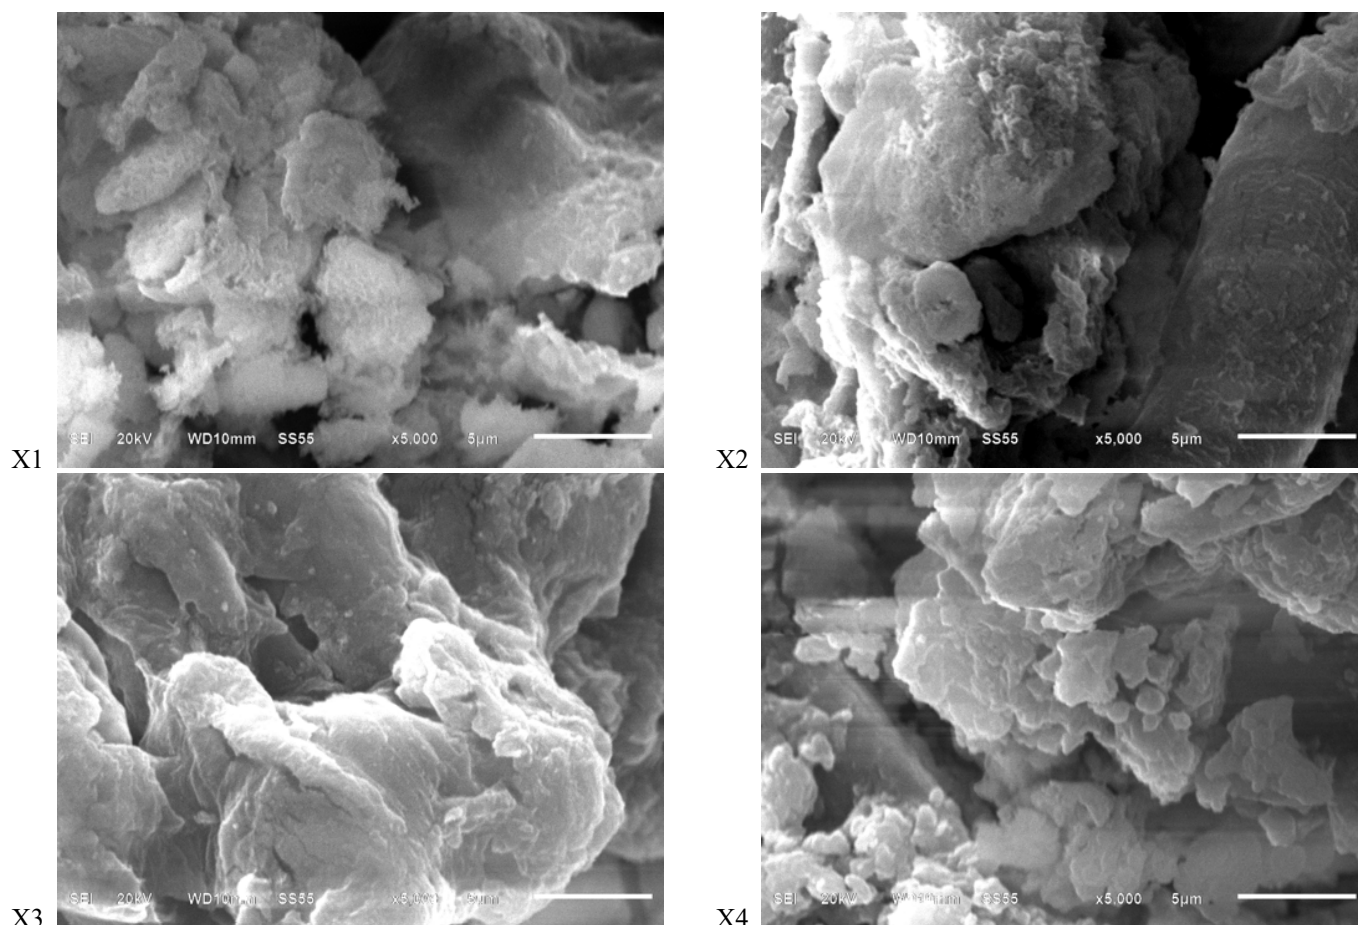

**Figure S1.** SEM images of X1, X2, X3 and X4 under 5000 magnification.
